# Supplementary material for: Metal Ions Modify In Vitro DNA Damage Yields with High-LET Radiation
Source: MDPI journal article supplement (doi:10.3390/toxics11090773), 2023-09-12
Supplement: s1 [file s1]

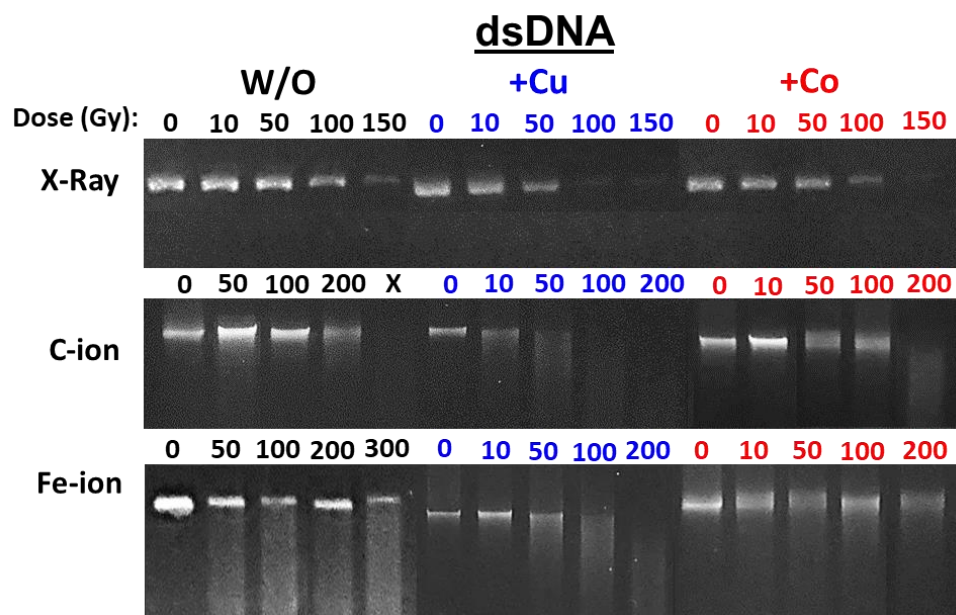

**Figure S1.** dsDNA Agarose gel images depicting the amount of dsDNA following each radiation source at increasing irradiation dosages of solutions without metal ions (w/o), with  $\text{Cu}^{2+}$  (+Cu) or with  $\text{Co}^{2+}$  (+Co)

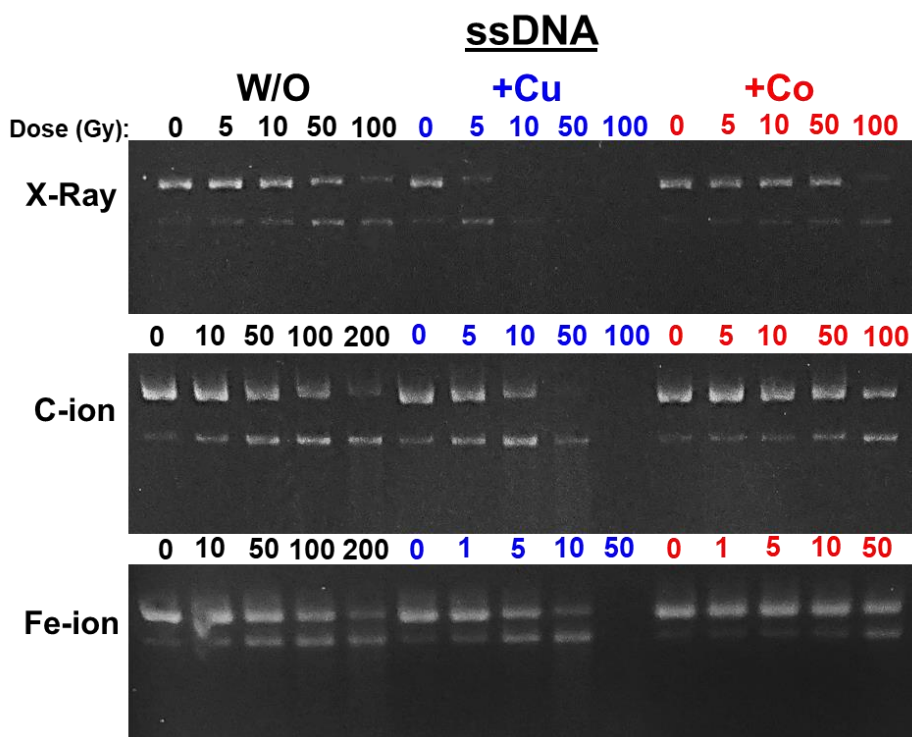

**Figure S2.** ssDNA Agarose gel images depicting the amount of ssDNA following each radiation source at increasing irradiation dosages of solutions without metal ions (w/o), with  $\text{Cu}^{2+}$  (+Cu) or with  $\text{Co}^{2+}$  (+Co)

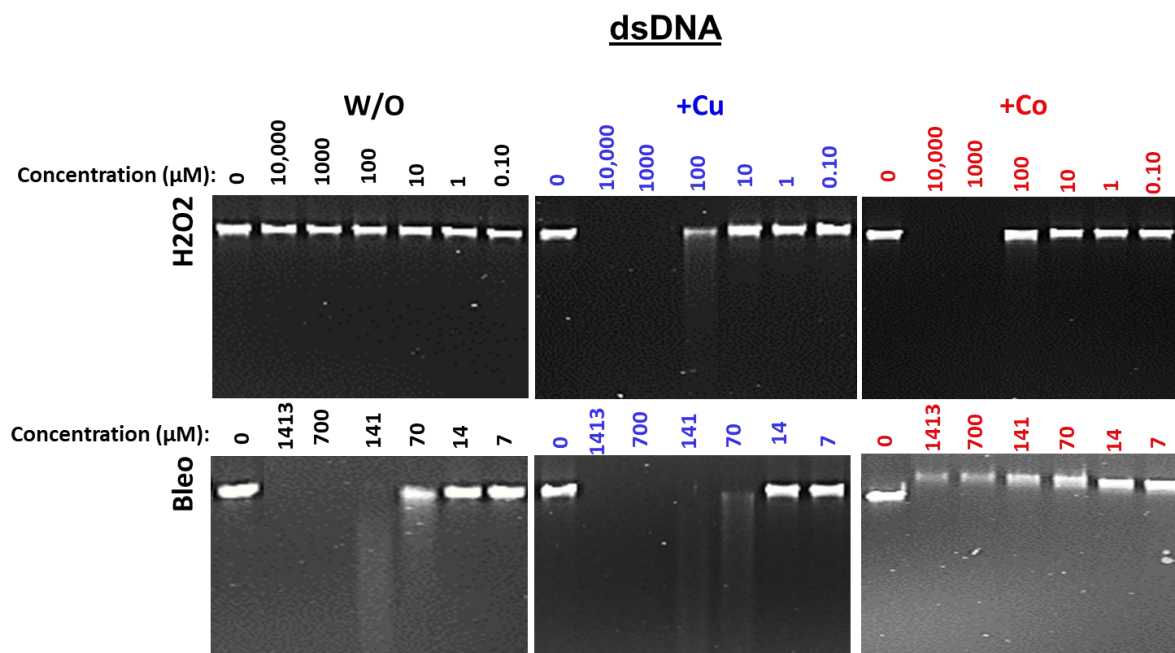

**Figure S3.** dsDNA Agarose gel images depicting the amount of dsDNA following chemical treatment ( $\text{H}_2\text{O}_2$  or Bleomycin) at increasing chemical concentrations in solutions without metal ions (w/o), with  $\text{Cu}^{2+}$  (+Cu) or with  $\text{Co}^{2+}$  (+Co)

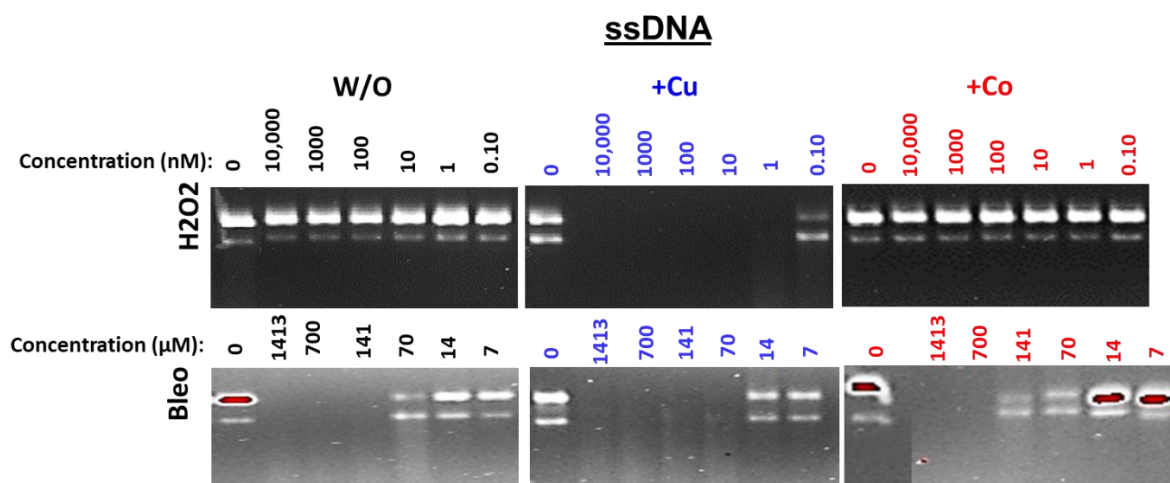

**Figure S4.** ssDNA Agarose gel images depicting the amount of ssDNA following chemical treatment ( $\text{H}_2\text{O}_2$  or Bleomycin) at increasing chemical concentrations in solutions without metal ions (w/o), with  $\text{Cu}^{2+}$  (+Cu) or with  $\text{Co}^{2+}$  (+Co)
